# Supplementary material for: Demonstration of a relationship between state transitions and photosynthetic efficiency in a higher plant
Source: PubMed Central journal article supplement — Biochem J. 2019 Nov 11;476(21):3295–312. doi: 10.1042/BCJ20190576 (PMC6854431; doi:10.1042/bcj20190576), 2019-11-11
Supplement: BCJ-476-3295-s1.pdf [file BCJ-476-3295-s1.pdf]

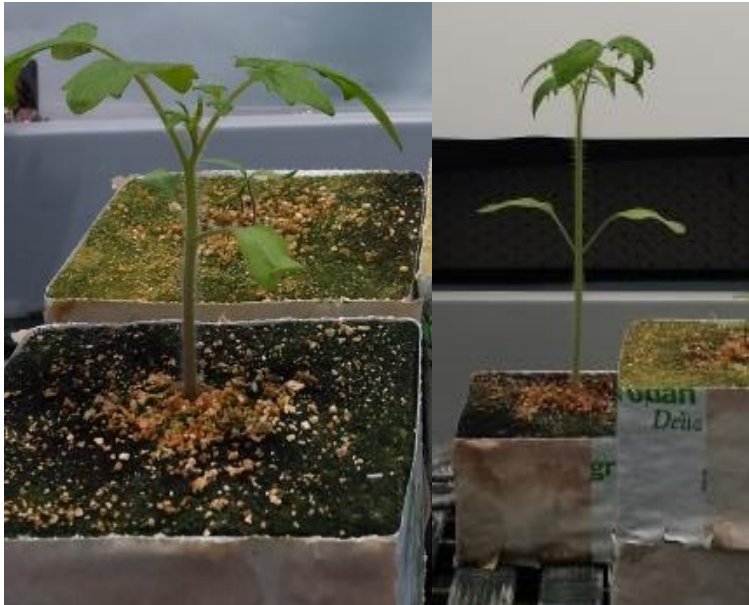

Supplementary Fig. 1: SUN grown plant (left) and SHADE grown plant (right) at about 20 days after sowing, showing the difference in etiolation caused by the light treatments.

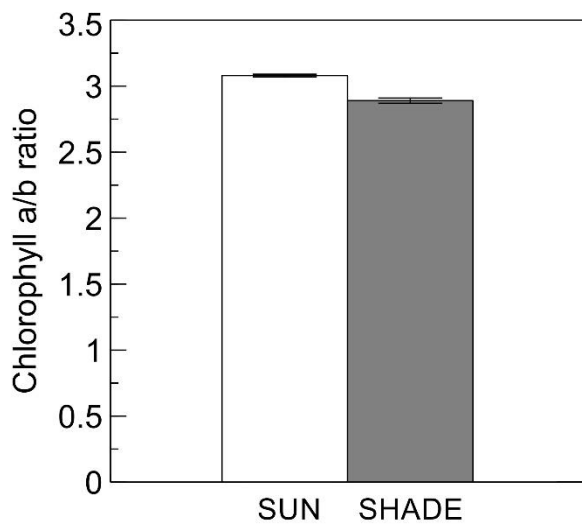

Supplementary Fig. 2: Chlorophyll a/b ratios for SUN and SHADE leaves. Error bars shown represent the SEM ( $n=3$ ).
